# Supplementary material
Source: PubMed Central journal article supplement (PMC4020409)
Supplement: NIHMS581759-supplement-Supp_Tab_1.pdf [file NIHMS581759-supplement-Supp_Tab_1.pdf]

Thorax

|                                                       | Men<br>(n=3,771)        |                         |                         |                         | Women<br>(n=4,476)       |                         |                         |                         |
|-------------------------------------------------------|-------------------------|-------------------------|-------------------------|-------------------------|--------------------------|-------------------------|-------------------------|-------------------------|
|                                                       | Non-Hispanic<br>White   | African-<br>American    | Hispanic                | Chinese-<br>American    | Non-Hispanic<br>White    | African-<br>American    | Hispanic                | Chinese-<br>American    |
| n (%)                                                 | 1235(30)                | 1185(31)                | 963(26)                 | 388(10)                 | 1349(30)                 | 1567(35)                | 1147(26)                | 413(9)                  |
| Age, mean (SD),<br>years                              | 63(10)                  | 61(10)                  | 60(10)                  | 62(10)                  | 63(10)                   | 61(10)                  | 61(10)                  | 62(10)                  |
| Height, mean (SD),<br>cm                              | 176(6.9)                | 176(7.0)                | 169(6.4)                | 168(6.0)                | 162(6.5)                 | 162(6.6)                | 156(6.1)                | 155(5.7)                |
| BMI, mean (SD), kg/m <sup>2</sup>                     | 28(4.1)                 | 29(4.9)                 | 29(4.5)                 | 24(3.1)                 | 28(5.8)                  | 31(6.5)                 | 30(5.9)                 | 24(3.4)                 |
| Smoking status, n (%)                                 |                         |                         |                         |                         |                          |                         |                         |                         |
| Never                                                 | 497(40)                 | 453(38)                 | 395(41)                 | 207(53)                 | 660(49)                  | 842(54)                 | 776(68)                 | 397(96)                 |
| Former                                                | 602(49)                 | 470(40)                 | 395(41)                 | 143(37)                 | 531(39)                  | 466(30)                 | 251(22)                 | 9(2)                    |
| Current                                               | 137(11)                 | 261(22)                 | 173(18)                 | 38(10)                  | 158(12)                  | 257(16)                 | 120(10)                 | 7(2)                    |
| Pack years of<br>smoking, * median<br>[IQR]           | 24.0<br>[9.0,44.0]      | 20.3<br>[8.8,36.8]      | 16.3<br>[5.9,34.5]      | 17.5<br>[5.4,33.0]      | 18.9<br>[6.0,36.8]       | 17.3<br>[6.4,33.0]      | 7.0<br>[2.0,16.5]       | 13.5<br>[2.0,19.5]      |
| Percent Emphysema<br>(%, SD)                          | 29(14.1)                | 23(13.5)                | 21(12.4)                | 22(12.8)                | 19(12.5)                 | 14(11.1)                | 13(9.7)                 | 12(9.0)                 |
| Ancestral principal Components (PC),<br>median, [IQR] |                         |                         |                         |                         |                          |                         |                         |                         |
| PC 1                                                  | 0.027<br>[0.015, 0.043] | 0.800<br>[0.698, 0.870] | 0.073<br>[0.054, 0.169] | 0.091<br>[0.088, 0.094] | 0.0199<br>[0.015, 0.036] | 0.804<br>[0.689, 0.876] | 0.089<br>[0.062, 0.200] | 0.091<br>[0.088, 0.095] |
| PC 2                                                  | 0.032<br>[0.026, 0.043] | 0.252<br>[0.222, 0.272] | 0.307<br>[0.189, 0.425] | 0.978<br>[0.971, 0.982] | 0.032<br>[0.025, 0.042]  | 0.252<br>[0.222, 0.274] | 0.299<br>[0.202, 0.432] | 0.976<br>[0.969, 0.982] |
| PC 3                                                  | 0.175<br>[0.167, 0.182] | 0.250<br>[0.240, 0.259] | 0.451<br>[0.284, 0.564] | 0.027<br>[0.019, 0.038] | 0.176<br>[0.170, 0.184]  | 0.250<br>[0.240, 0.256] | 0.428<br>[0.294, 0.566] | 0.028<br>[0.019, 0.040] |

**Abbreviations**

SD, standard deviation; BMI, body mass index; IQR, inter-quartile range;

**Footnotes:**

\* Among ever smokers.
