# Supplementary material
Source: PubMed Central journal article supplement (PMC4020409)
Supplement: NIHMS581759-supplement-Supp_Tab_2.pdf [file NIHMS581759-supplement-Supp_Tab_2.pdf]

Web supplemental Table 2. Mean difference in percent emphysema per 10 pack years of smoking, stratified by gender and race/ethnicity

|                                   | Non-Hispanic White    | African-American       | Hispanic              | Chinese-American       | P-value for differences by self-reported race/ethnic group | P-value for differences by principal components of ancestry |
|-----------------------------------|-----------------------|------------------------|-----------------------|------------------------|------------------------------------------------------------|-------------------------------------------------------------|
| Men (n)                           | 1,235                 | 1,185                  | 963                   | 388                    |                                                            |                                                             |
| Percent Emphysema difference (%)* | 0.17<br>(-0.11, 0.41) | -0.05<br>(-0.46, 0.36) | 0.28<br>(-0.18, 0.73) | -0.23<br>(-0.86, 0.41) | 0.17                                                       | 0.13                                                        |
| Women (n)                         | 1,349                 | 1,567                  | 1,147                 | 413                    | P-value for differences by self-reported race/ethnic group | P-value for differences by principal components of ancestry |
| Percent Emphysema difference (%)* | 0.87<br>(0.52, 1.23)  | 0.13<br>(-0.31, 0.57)  | 0.04<br>(-0.28, 0.36) |                        | 0.03                                                       | 0.10                                                        |

\* Percent emphysema model adjusted for 10-pack-years of smoking, age, height, body mass index, CT scanner type, smoking status.

† Excluding Chinese-American women as smoking rates too low for analysis
