# Supplementary material
Source: PubMed Central journal article supplement (PMC4020409)
Supplement: NIHMS581759-supplement-Supp_Tab_3.pdf [file NIHMS581759-supplement-Supp_Tab_3.pdf]

**Web supplemental table 3: Mean difference in lung function measures per 10 pack-years of smoking stratified by gender and race/ethnicity, among participants with greater than 10 pack-years smoking history**

|                                                | Non-Hispanic Whites     | African-Americans        | Hispanics               | Chinese-Americans      | P-value for differences across self-reported race/ethnic groups [p-value excluding Chinese-Americans] | P-value for differences by principal components of ancestry [p-value excluding Chinese-Americans] |
|------------------------------------------------|-------------------------|--------------------------|-------------------------|------------------------|-------------------------------------------------------------------------------------------------------|---------------------------------------------------------------------------------------------------|
| <b>Men (n=776)</b>                             |                         |                          |                         |                        |                                                                                                       |                                                                                                   |
| n.                                             | 310                     | 217                      | 157                     | 92                     |                                                                                                       |                                                                                                   |
| FEV <sub>1</sub> /FVC difference (%), (95% CI) | -0.81<br>(-1.23, -0.39) | -0.10<br>(-0.92, 0.71)   | -0.56<br>(-1.22, 0.10)  | -0.16<br>(-0.98, 0.66) | 0.66                                                                                                  | 0.62                                                                                              |
| FEV <sub>1</sub> difference (mL), (95% CI)     | -45.7<br>(-69.9, -21.2) | -4.42<br>(-49.2, 40.3)   | -36.9<br>(-72.1, -1.8)  | 4.56<br>(-29.8, 38.9)  | 0.06<br>[0.31]                                                                                        | 0.09<br>[0.39]                                                                                    |
| <b>Women (n=457)</b>                           |                         |                          |                         | Chinese-Americans†     | P-value for differences across self-reported race/ethnic groups                                       | P-value for differences by principal components of ancestry                                       |
| n.                                             | 235                     | 159                      | 56                      | 7                      |                                                                                                       |                                                                                                   |
| FEV <sub>1</sub> /FVC difference (%), (95% CI) | -1.05<br>(-1.41, 0.69)  | -0.77<br>(-1.24, -0.31)  | -0.73<br>(-1.30, -0.16) |                        | 0.78                                                                                                  | 0.68                                                                                              |
| FEV <sub>1</sub> difference (mL), (95% CI)     | -34.8<br>(-60.2, -9.3)  | -68.7<br>(-100.7, -36.7) | -24.1<br>(-72.3, 24.0)  |                        | 0.99                                                                                                  | 0.87                                                                                              |

Model adjusted for 10-pack-years of smoking, age, age<sup>2</sup>, height, height<sup>2</sup>, current smoking status, physician-diagnosed asthma before 45 years, family history of emphysema, cigar smoking status, cigar pack-years, second-hand smoke exposure, depth of inhalation, time before first cigarette in the morning, urinary cotinine level, history of hayfever, occupational exposure to dust, fumes or smoke, and educational attainment.

† Chinese-American women excluded from analysis due to small sample size with smoking history
