# Supplementary material
Source: PubMed Central journal article supplement (PMC4020409)
Supplement: NIHMS581759-supplement-Supp_Tab_4.pdf [file NIHMS581759-supplement-Supp_Tab_4.pdf]

Page 35 of 39  
 Web Supplemental Table 4. Mean difference in lung function measures per 10 pack-years of smoking, stratified by gender and race/ethnicity, and including adjustment for immigrant status and years lived in United States

|    | Non-Hispanic Whites              | African-Americans   | Hispanics         | Chinese-Americans | P-value for differences across self-reported race/ethnic groups [p-value excluding Chinese-Americans] | P-value for differences by principal components of ancestry [p-value excluding Chinese-Americans] |
|----|----------------------------------|---------------------|-------------------|-------------------|-------------------------------------------------------------------------------------------------------|---------------------------------------------------------------------------------------------------|
| 1  |                                  |                     |                   |                   |                                                                                                       |                                                                                                   |
| 2  |                                  |                     |                   |                   |                                                                                                       |                                                                                                   |
| 3  | Men                              |                     |                   |                   |                                                                                                       |                                                                                                   |
| 4  |                                  |                     |                   |                   |                                                                                                       |                                                                                                   |
| 5  | n.                               | 582                 | 402               | 342               | 283                                                                                                   |                                                                                                   |
| 6  |                                  |                     |                   |                   |                                                                                                       |                                                                                                   |
| 7  |                                  |                     |                   |                   |                                                                                                       |                                                                                                   |
| 8  |                                  |                     |                   |                   |                                                                                                       |                                                                                                   |
| 9  | FEV <sub>1</sub> /FVC difference |                     |                   |                   |                                                                                                       |                                                                                                   |
| 10 | (%), (95% CI)                    | -0.73               | -0.85             | -0.83             | -0.26                                                                                                 | 0.19                                                                                              |
| 11 |                                  | (-1.00, -0.46)      | (-1.37, -0.33)    | (-1.24, 0.41)     | (-0.81, 0.29)                                                                                         | 0.11                                                                                              |
| 12 |                                  |                     |                   |                   |                                                                                                       |                                                                                                   |
| 13 | FEV <sub>1</sub> difference      |                     |                   |                   |                                                                                                       |                                                                                                   |
| 14 | (mL), (95% CI)                   | -53.4               | -41.9             | -48.9             | -14.4                                                                                                 | 0.01                                                                                              |
| 15 |                                  | (-69.8, -36.9)      | (-68.8, -15.0)    | (-73.7, -24.0)    | (-43.1, 14.3)                                                                                         | [0.91]                                                                                            |
| 16 |                                  |                     |                   |                   |                                                                                                       | 0.004                                                                                             |
| 17 |                                  |                     |                   |                   |                                                                                                       | [0.38]                                                                                            |
| 18 |                                  |                     |                   |                   |                                                                                                       |                                                                                                   |
| 19 |                                  |                     |                   |                   | P-value for differences across self-reported race/ethnic groups                                       | P-value for differences by principal components of ancestry                                       |
| 20 | Women                            | Non-Hispanic Whites | African-Americans | Hispanics         | Chinese-Americans†                                                                                    |                                                                                                   |
| 21 |                                  |                     |                   |                   |                                                                                                       |                                                                                                   |
| 22 |                                  |                     |                   |                   |                                                                                                       |                                                                                                   |
| 23 |                                  |                     |                   |                   |                                                                                                       |                                                                                                   |
| 24 |                                  |                     |                   |                   |                                                                                                       |                                                                                                   |
| 25 | n.                               | 591                 | 471               | 395               | 278                                                                                                   |                                                                                                   |
| 26 |                                  |                     |                   |                   |                                                                                                       |                                                                                                   |
| 27 | FEV <sub>1</sub> /FVC difference |                     |                   |                   |                                                                                                       |                                                                                                   |
| 28 | (%), (95% CI)                    | -1.05               | -0.77             | -0.73             |                                                                                                       | 0.43                                                                                              |
| 29 |                                  | (-1.41, 0.69)       | (-1.24, -0.31)    | (-1.30, -0.16)    |                                                                                                       | 0.31                                                                                              |
| 30 |                                  |                     |                   |                   |                                                                                                       |                                                                                                   |
| 31 | FEV <sub>1</sub> difference      |                     |                   |                   |                                                                                                       |                                                                                                   |
| 32 | (mL), (95% CI)                   | -42.3               | -43.8             | -36.5             |                                                                                                       | 0.52                                                                                              |
| 33 |                                  | (-59.3, -25.3)      | (-63.9, -23.6)    | (-64.2, -8.7)     |                                                                                                       | 0.59                                                                                              |

Model adjusted for 10-pack-years of smoking, age, age<sup>2</sup>, height, height<sup>2</sup>, current smoking status, physician-diagnosed asthma before 45 years, family history of emphysema, cigar smoking status, cigar pack-years, second-hand smoke exposure, depth of inhalation, time before first cigarette in the morning, urinary cotinine level, history of hayfever, occupational exposure to dust, fumes or smoke, and educational attainment.  
 † Chinese-American women excluded from analysis due to small sample size with smoking history
