# Supplementary material
Source: PubMed Central journal article supplement (PMC4020409)
Supplement: NIHMS581759-supplement-Supp_Tab_5.pdf [file NIHMS581759-supplement-Supp_Tab_5.pdf]

**Web Supplemental Table 5. Mean difference in lung function measures per 10 pack-years of smoking, stratified by gender and race/ethnicity, among participants age 45-65 years.**

|                                                | Non-Hispanic Whites      | African-Americans       | Hispanics              | Chinese-Americans      | P-value for differences across self-reported race/ethnic groups [p-value excluding Chinese-Americans] | P-value for differences by principal components of ancestry [p-value excluding Chinese-Americans] |
|------------------------------------------------|--------------------------|-------------------------|------------------------|------------------------|-------------------------------------------------------------------------------------------------------|---------------------------------------------------------------------------------------------------|
| <b>Men (n=857)</b>                             |                          |                         |                        |                        |                                                                                                       |                                                                                                   |
| n.                                             | 292                      | 223                     | 204                    | 138                    |                                                                                                       |                                                                                                   |
| FEV <sub>1</sub> /FVC difference (%), (95% CI) | -0.70<br>(-1.23, -0.18)  | -0.22<br>(-0.94, -0.50) | -0.43<br>(-1.34, 0.47) | -0.50<br>(-1.82, 0.83) | 0.16                                                                                                  | 0.11                                                                                              |
| FEV <sub>1</sub> difference (mL), (95% CI)     | -52.4<br>(-86.7, -18.02) | -21.3<br>(-64.6, 22.0)  | 0.74<br>(-67.7, 69.2)  | -59<br>(139.4, 21.1)   | 0.08                                                                                                  | 0.02<br>[0.02]                                                                                    |
| <b>Women (n=902)</b>                           |                          |                         |                        | Chinese-Americans†     | P-value for differences across self-reported race/ethnic groups                                       | P-value for differences by principal components of ancestry                                       |
| n.                                             | 303                      | 231                     | 224                    | 144                    |                                                                                                       |                                                                                                   |
| FEV <sub>1</sub> /FVC difference (%), (95% CI) | -0.58<br>(-1.22, -0.06)  | -0.18<br>(-1.14, 0.77)  | -0.33<br>(-1.04, 0.37) |                        | 0.38                                                                                                  | 0.14                                                                                              |
| FEV <sub>1</sub> difference (mL), (95% CI)     | -34.7<br>(-207, 344)     | -33.6<br>(-79.0, 11.9)  | -50.8<br>(-94.0, -7.5) |                        | 0.73                                                                                                  | 0.74                                                                                              |

Model adjusted for 10-pack-years of smoking, age, age<sup>2</sup>, height, height<sup>2</sup>, current smoking status, physician-diagnosed asthma before 45 years, family history of emphysema, cigar smoking status, cigar pack-years, second-hand smoke exposure, depth of inhalation, time before first cigarette in the morning, urinary cotinine level, history of hayfever, occupational exposure to dust, fumes or smoke, and educational attainment.

† Chinese-American women excluded from analysis due to small sample size with smoking history
