# Supplementary material
Source: PubMed Central journal article supplement (PMC4020409)
Supplement: NIHMS581759-supplement-Supp_Tab_6.pdf [file NIHMS581759-supplement-Supp_Tab_6.pdf]

Web Supplemental Table 6: Interaction between principal components of ancestry and lung function measures, stratified by site and gender

|                               | Men    | Women |
|-------------------------------|--------|-------|
| Winston-Salem, North Carolina | n= 298 | n=299 |
| FEV <sub>1</sub> /FVC         | 0.46   | 0.08  |
| FEV <sub>1</sub>              | 0.17   | 0.47  |
| New York, New York            | n=341  | n=397 |
| FEV <sub>1</sub> /FVC         | 0.31   | 0.08  |
| FEV <sub>1</sub>              | 0.56   | 0.1   |
| Baltimore, Maryland           | n=243  | n=245 |
| FEV <sub>1</sub> /FVC         | 0.03   | 0.78  |
| FEV <sub>1</sub>              | 0.12   | 0.22  |
| Minnesota                     | n=287  | n=263 |
| FEV <sub>1</sub> /FVC         | 0.58   | 0.19  |
| FEV <sub>1</sub>              | 0.75   | 0.82  |
| Chicago, Illinois             | n=366  | n=372 |
| FEV <sub>1</sub> /FVC         | 0.09   | 0.71  |
| FEV <sub>1</sub>              | 0.11   | 0.14  |
| Los Angeles, California       | n=420  | n=434 |
| FEV <sub>1</sub> /FVC         | 0.25   | 0.05  |
| FEV <sub>1</sub>              | 0.07   | 0.03  |

Confidential: For Review Only
